## A Pandas complex adapted for piRNA-guided transposon silencing

Kang Zhao<sup>#1</sup>, Sha Cheng<sup>#2</sup>, Na Miao<sup>#1</sup>, Ping Xu<sup>#1,3</sup>, Xiaohua Lu<sup>#1</sup>, Ming Wang<sup>1</sup>, Yuhan Zhang<sup>2</sup>, Xun Yuan<sup>2</sup>, Weiwei Liu<sup>1</sup>, Xin Lu<sup>1</sup>, Xuan Ouyang<sup>1</sup>, Peng Zhou<sup>1</sup>, Jiaqi Gu<sup>1,4</sup>, Yiqun Zhang<sup>1</sup>, Ding Qiu<sup>1</sup>, Shan Wang<sup>1</sup>, Zhaohui Jin<sup>2</sup>, Youzhong Wan<sup>3</sup>, Jinbiao Ma<sup>4</sup>, Ying Huang<sup>2,5</sup>, Yang Yu<sup>1,5</sup>

<sup>1</sup>Institute of Biophysics, Key Laboratory of RNA Biology, Chinese Academy of Sciences, University of Chinese Academy of Sciences, Beijing, China, 100101

<sup>2</sup>State Key Laboratory of Molecular Biology, Shanghai Key Laboratory of Molecular Andrology, CAS Center for Excellence in Molecular Cell Science, Shanghai Institute of Biochemistry and Cell Biology, Chinese Academy of Sciences, University of Chinese Academy of Sciences, Shanghai, China, 200031

<sup>3</sup>School of Life Sciences, National Engineering Laboratory of AIDS Vaccine, Key Laboratory for Molecular Enzymology and Engineering of Ministry of Education, Jilin University, Changchun, Jilin, China, 130012

<sup>4</sup>State Key Laboratory of Genetic Engineering, Department of Biochemistry, School of Life Sciences, Fudan University, Shanghai, China, 200438

<sup>#</sup>contributed equally

<sup>5</sup>correspondence: yuyang@ibp.ac.cn; huangy@sibcb.ac.cn

Keywords: piRNA, transposon silencing, dNxf2, Panoramix, crystal structure, *Drosophila*, dNxf1/TAP, dNxt1/p15

39 **Abstract**

40 **The repression of transposons by the Piwi-interacting RNA (piRNA) pathway is essential to**  
41 **protect animal germ cells. In *Drosophila* ovaries, Panoramix (Panx) enforces transcriptional**  
42 **silencing by binding to the target-engaged Piwi-piRNA complex, although the precise**  
43 **mechanisms by which this occur remain elusive. Here, we show that Panx functions**  
44 **together with a germline specific paralogue of a nuclear export factor, dNxf2, and its**  
45 **cofactor dNxt1 (p15) as a ternary complex to suppress transposon expression. Structural**  
46 **and functional analysis demonstrate that dNxf2 plays critical roles in Panx association via**  
47 **its UBA domain, and transposon silencing through binding to transposon transcripts**  
48 **directly. Furthermore, dNxf2 interacts with dNxf1 (TAP), which, unexpectedly, is also**  
49 **required for Panx-mediated silencing. Therefore, we propose that dNxf2 may function as a**  
50 **Pandas (Panoramix-dNxf2 dependent TAP/p15 silencing) complex, which counteracts the**  
51 **canonical RNA exporting machinery (TAP/p15) and restricts transposons to nuclear**  
52 **peripheries.**

53 To maintain eukaryotic genome integrity, nascent transcripts of transposons are often targeted by  
54 nuclear Argonaute proteins for transcriptional gene silencing (TGS)(1-5). In animal gonads, the  
55 PIWI-clade Argonautes guided by piRNAs (PIWI-interacting RNA) are thought to recognize nascent  
56 transposon transcripts and direct sequence-specific heterochromatin formation(3). As a critical  
57 cofactor of *Drosophila* nuclear Piwi, Panoramix (Panx, also known as Silencio) links the target-  
58 engaged Piwi-piRNA complex to the general silencing machinery(6, 7). Enforced tethering of Panx  
59 to nascent transcripts leads to cotranscriptional silencing and correlates with deposition of histone  
60 H3 lysine 9 trimethylation (H3K9me3) marks(6, 7). However, the mechanism by which Panx  
61 mediates the repression remains unknown.

62  
63 We cross-examined proteins that co-immunoprecipitated with Panx (fig. S1A) with piRNA  
64 pathway candidate genes from RNA interference (RNAi) screens(8-11). Unexpectedly, we  
65 identified dNxf2 as a potential cofactor of Panx (fig. S1A-C). dNxf2 belongs to an evolutionarily  
66 conserved NXF (nuclear export factor) family of proteins, yet depletion of dNxf2 had no effect on  
67 polyadenylated mRNA export(12, 13). Instead, dNxf2 and its cofactor dNxt1 (also known as p15)  
68 were both identified in two published RNAi screens as being essential for transposon silencing(8,  
69 9). Similar to Panx, dNxf2 is specifically expressed in female gonads (fig. S1D).

70  
71 To validate the interaction between Panx and dNxf2, we performed GFP immunoprecipitation  
72 from ovaries expressing GFP-Panx fusion under its native promoter. Results of mass spectrometry  
73 analysis (fig. S1B) and western blotting demonstrated that endogenous dNxf2 is associated with  
74 Panx (Fig. 1A). Likewise, Halo-tagged dNxf2 was able to precipitate endogenous Panx proteins  
75 from Ovarian Somatic Cell (OSC) lysates (Fig. 1B). We next tested if dNxf2 is functionally required  
76 for Panx-mediated silencing. The luciferase transcripts with BoxB sites in their 3' untranslated  
77 regions are repressed if  $\lambda$ N-Panx is tethered(6, 7). The luciferase expression was then measured

78 upon germline-specific knockdowns of dNxf2 or dNxt1 (Fig. 1C). Despite  $\lambda$ N-Panx tethering, loss  
79 of either dNxf2 or dNxt1 significantly weakened the ability of Panx to repress the reporter, as  
80 compared to the controls (Zuc or attp2, Fig. 1C). Consistent with the reporter de-repression,  
81 transposon transcripts are elevated upon dNxf2 RNAi (fig. S1E). Taken together, our data suggests  
82 that dNxf2 and dNxt1 may function as a heterodimer either with or downstream of Panx to suppress  
83 transposon expression.

84

85 Next, we used RNA sequencing (RNA-seq) to examine global effects on transposon  
86 expression with germline-specific knockdowns of dNxf2, compared with Panx RNAi (Fig. 1D-F). As  
87 expected, dNxf2 knockdown triggered a dramatic increase of transposon transcripts (Fig. 1D). The  
88 effect is similar to that of Panx (Fig. 1E-F), suggesting that dNxf2 is specifically required for silencing  
89 of transposons repressed by Panx. To rule out off-target effects of RNAi, we generated mutants of  
90 dNxf2 using CRISPR/Cas9 (fig. S2A)(14). Although the mutation we isolated removed just 20  
91 amino acids from the N-terminus of dNxf2, mutant female flies were sterile (fig. S2B), similar to  
92 other core piRNA pathway mutants(6). Loss of dNxf2 had essentially no effect on Piwi nuclear  
93 localization or stability (fig. S2C-D), consistent with dNxf2's function as an effector protein.  
94 Furthermore, dNxf2 mutants showed global up-regulation of transposons (fig. S2E-G) and de-  
95 repression of the luciferase reporter despite  $\lambda$ N-Panx tethering (fig. S3A). We noticed here that the  
96 endogenous Panx protein level is significantly reduced in the absence of dNxf2 (fig. S2D). To rule  
97 out the possibility that dNxf2 might affect transposons indirectly via Panx stability, we measured  
98 transposon expression upon overexpressing  $\lambda$ N-Flag-Panx under the dNxf2 mutant background  
99 (fig. S3A-E). Consistently, dNxf2 mutant female flies lost transposon control (fig. S3C-D) and were  
100 complete sterile despite the overexpression of  $\lambda$ N-Flag-Panx (fig. S3E).

101

102 The striking phenotypic similarities between dNxf2 and Panx prompted us to test whether these

103 two proteins interact directly. Therefore, we used yeast two-hybrid (Y2H) assays to determine the  
104 interacting regions. The domain architecture of dNxf2 is very similar to that of the canonical RNA  
105 export factor, dNxf1/TAP (also known as sbr, Fig. 2A). Both proteins contain leucine-rich repeats  
106 (LRR), an RNA recognition motif (RRM), a nuclear transport factor 2 (NTF2)-like domain, and a  
107 ubiquitin-associated domain (UBA). Interestingly, Panx only interacts with the UBA domain of dNxf2  
108 (Fig. 2B). This interaction is specific as the UBA domain of dNxf1 showed no binding (Fig. 2B).  
109 Surprisingly, however, neither full length nor the NTF2-UBA fragment of dNxf2 could bind Panx  
110 (Fig. 2B), suggesting that the UBA domain of dNxf2 might be in a “closed” conformation in the  
111 presence of the NTF2 domain. Additionally, the interactions between dNxt1 and the NTF2 domains  
112 of either dNxf2 or dNxf1 are significantly weakened in the presence of its UBA domain (Fig. 2C).  
113 Since *Drosophila* Nxt1 is absent in yeast, we tested whether dNxt1 might release the UBA domain  
114 from the NTF2 domain to permit Panx binding. Indeed, ectopic expression of dNxt1 is sufficient to  
115 allow full length dNxf2 to interact with Panx in a yeast-three hybrid assay (Fig. 2D). Next, we  
116 mapped the minimum region of Panx down to residues 315-343 (NIR, dNxf2 interacting region) as  
117 sufficient for UBA binding (Fig. 2E and fig. S3I). Consistent with the fact that dNxt1 forms a  
118 heterodimer with dNxf2(12), we found that dNxt1 co-migrates with a fusion protein comprised of  
119 dNxf2<sup>NTF2-UBA</sup>-(Gly-Ser)<sub>4</sub>-Panx<sup>NIR</sup> by size-exclusive chromatography (Fig. 2F), suggesting that Panx,  
120 dNxf2, and dNxt1 may exist as a ternary complex. Indeed, purified Panx<sup>NIR</sup> forms a stable complex  
121 with the UBA domain of dNxf2 with a dissociation constant of ~3.2 μM (Fig. 2G). Despite many  
122 efforts, we failed to crystalize the dNxf2<sup>NTF2</sup> domain. Therefore, we determined the crystal structure  
123 of dNxf1<sup>NTF2</sup> in complex with dNxt1 and modelled the binding of dNxf2<sup>NTF2</sup> to dNxt1 (fig. S4A).  
124 Consistent with the Y2H results, dNxf2<sup>NTF2</sup> maintained most, if not all, residues that interact with  
125 dNxt1 (fig. S4A-E).

126

127 To further explore the molecular basis of interactions between dNxf2 and Panx, we determined

128 the structure of the dNxf2-Panx complex (Fig. 3A-D). The structure was solved to a 1.5-Å resolution  
129 (Table S1). dNxf2<sup>UBA</sup> forms a compact three-helix bundle ( $\alpha$ 1– $\alpha$ 3) with a  $3_{10}$ -helix ( $\eta$ 1) at the C-  
130 terminus (Fig. 3B). The Panx<sup>NIR</sup> is folded into a long  $\alpha$ -helix and lays on the hydrophobic surface  
131 formed by  $\alpha$ 2 and  $\alpha$ 3 (Fig. 3B-C and fig. S4F). A324, A328, V331, L332, and I335 on Panx interact  
132 with V800, F819, F826, F840, L823 and I827 on dNxf2 via hydrophobic interactions (Fig. 3D).  
133 Moreover, R321 and R327 on Panx form salt bridges with D837 and E799 on Nxf2<sup>UBA</sup>, respectively  
134 (Fig. 3D). To validate the intermolecular interactions between dNxf2 and Panx, we mutated key  
135 residues of the interacting interface (Fig. 3E). While either L823A or D837A single point mutation  
136 affected the binding between Panx and dNxf2<sup>UBA</sup>, the double point mutation of dNxf2<sup>UBA</sup>  
137 F826A/I827A nearly abolished the interactions with Panx in both Y2H and co-immunoprecipitation  
138 assays (Fig. 3E-F), highlighting the significant contribution of these residues in Panx binding.

139  
140 Having demonstrated direct binding between dNxf2 and Panx, we next tested the functional  
141 importance of this interaction. We took advantage of a previously described  $\lambda$ N/BoxB luciferase  
142 reporter system to see if artificial tethering of dNxf2 could lead to repression. Indeed, we observed  
143 significant repression upon tethering of a  $\lambda$ N-dNxf2 fusion protein (Fig. 3G), unlike that of the  
144 negative controls ( $\lambda$ N-YFP or GFP-dNxf2 lacking a  $\lambda$ N-tag). Similar to Panx, the level of  $\lambda$ N-dNxf2  
145 mediated repression appeared to be dosage-dependent, as it correlated with the number of BoxB  
146 binding sites (Fig. 3H). Most importantly, the repression is dependent on the presence of the dNxf2  
147 UBA domain (Fig. 3G, dNxf2- $\Delta$ UBA).

148  
149 Our structure provided insight into why dNxf2<sup>UBA</sup> prefers to bind the silencing factor Panx rather  
150 than the FG repeats of the nuclear pore complex (NPC). In contrast to the highly charged surface  
151 of the Nxf1-type UBA (i.e. hsNxf1 or scMex67), dNxf2<sup>UBA</sup> favors hydrophobic binding with Panx  
152 (Fig. 3C and fig. S5A-B). Key residues on the interacting interface are highly conserved among

153 different *Drosophila* species but altered in the Nxf1-type UBA (fig. S5A). On the opposite surface  
154 of the Nxf1-type UBA, a hydrophobic pocket is formed to accommodate the FxFG peptide of the  
155 NPC (fig. S5C-D). However, this pocket is missing in dNxf2<sup>UBA</sup> due to a salt bridge formed between  
156 K829 and E814 (fig. S5C). Additionally, the bulky side chain of L825 on dNxf2<sup>UBA</sup> may hinder FG  
157 binding (fig. S5C). In contrast, the corresponding amino acids in hsNxf1 (A602) or scMex67 (G583)  
158 contain much smaller side chains (fig. S5C-D), therefore, give space for FxFG interactions.  
159 Consistent with the structural prediction, dNxf2<sup>UBA</sup> failed to interact with the FG-repeats of Nup214,  
160 a NPC component known to interact with dNxf1<sup>UBA</sup> (fig. S5E) (13). Since two copies of FG binding  
161 domains (NTF2 and UBA) are minimally required for proper RNA export(15), dNxf2 lacks at least  
162 one copy of the FG binding domain (UBA) and thus cannot export RNAs.

163

164 The predicted RNA binding domains at the N-terminus of dNxf2 imply that dNxf2 might directly  
165 bind to transposon transcripts *in vivo* (Fig. 3A)(12). To validate this hypothesis, we performed  
166 GoldCLIP/RT-qPCR experiments using an engineered OSC line in which a Halo-tag was fused to  
167 the C-terminus of dNxf2 (dNxf2-Halo) (fig. S6A-F)(16). GoldCLIP took advantage of the covalent  
168 attachment of the Halo-tag to its ligand, affording a denaturing purification of crosslinked protein-  
169 RNA complexes(17). Strikingly, following UV crosslinking, transposon transcripts (mdg1), but not  
170 rp49, remained attached to the dNxf2-Halo fusion protein despite denaturing washes (fig. S6B-C).  
171 The association appeared to be direct as it depends on UV crosslinking (fig. S6B-C). Interestingly,  
172 the interaction was only observed when both histone H1 and Heterochromatin Protein 1a (HP1a)  
173 were depleted by RNAi, but not in the control knockdown (fig. S6B-C). This correlates with the idea  
174 that the majority of transposon transcripts remain suppressed in a wildtype background and  
175 therefore are not available for dNxf2 binding. Nevertheless, if the downstream silencing factors (H1  
176 and HP1a) were removed, transposon transcripts could accumulate and bind dNxf2 (fig. S6B). In  
177 contrast, we failed to detect any CLIP signal on Frogger despite of dramatic up-regulation of its

178 transcripts upon RNAi (fig. S6D). Since Frogger does not appear to be targeted by Piwi-piRNAs in  
179 OSCs(18), this result suggests that the binding of dNxf2 to transposon is potentially piRNA-guided.  
180 In order to obtain enough material, we performed GoldCLIP-seq experiments using dNxf2-Halo  
181 knock-in OSCs depleted of Maelstrom, a piRNA pathway effector component either parallel or  
182 downstream of H3K9me3 establishment on transposons(19). Consistent with the RT-qPCR results,  
183 CLIP-seq demonstrated that dNxf2 binds to Piwi-targeted transposons (Fig. 4A). Collectively, our  
184 data strongly argues that Panx and dNxf2/dNxt1 function together as a stable complex to directly  
185 suppress transposons that are targeted by Piwi-piRNAs.

186  
187 Loss of Panx leads to significantly decreased H3K9me3 marks over transposons(6, 7). We  
188 next tested if loss of dNxf2 could result in similar phenomena. Since Panx is unstable in the absence  
189 of dNxf2 (fig. S2), we performed H3K9me3 ChIP-qPCR assays over several transposons while  
190 driving Panx overexpression under a strong promoter (Ubiquitin). H3K9me3 changes seemed  
191 rather modest upon removal of dNxf2 (fig. S8B). This result prompted us to look for alternative  
192 explanations for dNxf2-mediated silencing. In this regard, dNxf1 was found to be required for  
193 transposon silencing in a genome-wide RNAi screen(10). Additionally, female flies with mutant  
194 alleles of dNxf1 are sterile and have defects in meiotic spindles(20), a phenotype reminiscent of  
195 core piRNA pathway mutants(21, 22). Hence, we tested if dNxf1 is required for Panx-mediated  
196 silencing. Consistent with the RNAi screen data, germline specific depletion of dNxf1 significantly  
197 impaired the repression induced by  $\lambda$ N-Panx, thereby genetically placing dNxf1 in the Panx-  
198 mediated silencing pathway (Fig. 4B). Human Nxf1/TAP has been reported to oligomerize with  
199 other NXF family members to regulate RNA export(23, 24). Next we tested whether dNxf2 might  
200 interact with dNxf1 directly. Indeed, GFP-tagged dNxf2 can co-immunoprecipitate Halo-tagged  
201 dNxf1 from OSC lysates (Fig. 4C). Further domain truncations showed that either NTF2 or UBA  
202 domain of dNxf1 is sufficient to interact with the NTF2 domain of dNxf2 (Fig. 4D and fig. S10).



203 Moreover, GST pull-down assays demonstrated a direct association between dNxf1 and dNxf2 (Fig.  
204 4E and fig. S11). To rule out any indirect or off-target effect of dNxf1 knockdowns, we re-introduced  
205 either wild-type dNxf1 or a truncated dNxf1 missing the RNA binding domains ( $\Delta$ RBD=RRM+LRR)  
206 driven by Ubiquitin promoter. As expected, wild-type dNxf1 suppressed the transposon  
207 overexpression caused by the shRNA targeting the 5' untranslated region of endogenous dNxf1  
208 (Fig. 4F). Importantly, the truncated dNxf1 lacking the RNA cargo binding domains ( $\Delta$ RBD)  
209 maintained the ability to rescue transposon silencing (Fig. 4F). Because the RBD of dNxf1 is  
210 required for RNA export, our results strongly argue against an indirect involvement of dNxf1 in  
211 transposon suppression. Next, we sort to directly visualize potential changes in RNA localization  
212 by using a rapamycin-induced tethering system (Fig. 4G and fig. S7). GFP mRNAs containing 10  
213 copies of BoxB binding sites tethered with  $\lambda$ N-FKBP are mostly localized in the cytoplasm (Fig. 4G).  
214 Upon Rapamycin treatment,  $\lambda$ N-FKBP dimerizes with FRB-dNxf2 fusion protein, allowing tethering  
215 of dNxf2 to the GFP mRNAs. Intriguingly, GFP mRNAs tethered with FRB-dNxf2 start to  
216 accumulate at nuclear peripheries (Fig. 4G). The effect is specific to dNxf2 because FRB alone  
217 failed to cause any change. Given these properties, we named this multi-protein complex as  
218 Pandas (Panx-Nxf2 dependent TAP/p15 silencing). Our data raise the possibility that deterring  
219 dNxf1's function in transposon RNA export may be a key event in the process of piRNA-guided  
220 silencing (fig. S12).

221  
222 Like any coding mRNA, if not restrained by Piwi-piRNAs, transposon transcripts would likewise  
223 be transported into the cytoplasm by the dNxf1/dNxt1 exporting machinery(13). In piRNA-guided  
224 TGS, dNxf2/dNxt1 may function together with Panx as a stable complex to counteract this process  
225 (fig. S12). As shown by our structural analysis, dNxf2<sup>UBA</sup> has evolved to lose its ability to bind the  
226 NPC (fig. S5). Accordingly, part of dNxf2's silencing function may be hijacking the RNA exporting  
227 machinery and repurposing dNxf1 into a "dead-end" complex, hence trapping transposon

228 transcripts within the nucleus (Fig. 4G). In this regard, dNxf1 can localize to nuclear peripheries in  
229 which most constitutive heterochromatin resides(12, 25-27). Sequestering transposons to these  
230 compartments via the Pandas complex may help to establish/maintain their heterochromatic state  
231 (fig. S9)(26, 27). Therefore, dNxf2 is likely to function in the Pandas complex to combat transposon  
232 expression, at least in part by preventing transposon RNA export (fig. S12).

233 **REFERENCES**

- 234 1. D. T. Ge, P. D. Zamore, Small RNA-directed silencing: the fly finds its inner fission yeast?  
235 *Curr. Biol.* **23**, R318–20 (2013).
- 236 2. R. Martienssen, D. Moazed, RNAi and heterochromatin assembly. *Cold Spring Harb*  
237 *Perspect Biol.* **7**, a019323 (2015).
- 238 3. B. Czech, G. J. Hannon, One Loop to Rule Them All: The Ping-Pong Cycle and piRNA-  
239 Guided Silencing. *Trends Biochem. Sci.* **0** (2016), doi:10.1016/j.tibs.2015.12.008.
- 240 4. D. M. Ozata, I. Gainetdinov, A. Zoch, D. X. N. O. X. Carroll, P. D. Zamore, PIWI-interacting  
241 RNAs: small RNAs with big functions. *Nat. Rev. Genet.*, 1–20 (2018).
- 242 5. I. Gainetdinov, C. Colpan, A. Arif, K. Cecchini, P. D. Zamore, A Single Mechanism of  
243 Biogenesis, Initiated and Directed by PIWI Proteins, Explains piRNA Production in Most  
244 Animals. *Mol. Cell.* **71**, 775–790.e5 (2018).
- 245 6. Y. Yu *et al.*, Panoramix enforces piRNA-dependent cotranscriptional silencing. *Science.*  
246 **350**, 339–342 (2015).
- 247 7. G. Sienski *et al.*, Silencio/CG9754 connects the Piwi-piRNA complex to the cellular  
248 heterochromatin machinery. *Genes Dev.* **29**, 2258–2271 (2015).
- 249 8. B. Czech, J. B. Preall, J. McGinn, G. J. Hannon, A transcriptome-wide RNAi screen in the  
250 Drosophila ovary reveals factors of the germline piRNA pathway. *Mol. Cell.* **50**, 749–761  
251 (2013).
- 252 9. F. Muerdter *et al.*, A genome-wide RNAi screen draws a genetic framework for transposon  
253 control and primary piRNA biogenesis in Drosophila. *Mol. Cell.* **50**, 736–748 (2013).
- 254 10. D. Handler *et al.*, The genetic makeup of the Drosophila piRNA pathway. *Mol. Cell.* **50**,  
255 762–777 (2013).
- 256 11. K. G. Guruharsha *et al.*, A protein complex network of Drosophila melanogaster. *Cell.* **147**,  
257 690–703 (2011).
- 258 12. A. Herold, T. Klymenko, E. Izaurralde, NXF1/p15 heterodimers are essential for mRNA  
259 nuclear export in Drosophila. *RNA.* **7**, 1768–1780 (2001).
- 260 13. J. Katahira, Nuclear export of messenger RNA. *Genes (Basel).* **6**, 163–184 (2015).
- 261 14. F. Port, H.-M. Chen, T. Lee, S. L. Bullock, Optimized CRISPR/Cas tools for efficient  
262 germline and somatic genome engineering in Drosophila. *Proc. Natl. Acad. Sci. U.S.A.* **111**,  
263 E2967–76 (2014).
- 264 15. I. C. Braun, A. Herold, M. Rode, E. Izaurralde, Nuclear export of mRNA by TAP/NXF1  
265 requires two nucleoporin-binding sites but not p15. *Mol. Cell. Biol.* **22**, 5405–5418 (2002).
- 266 16. D. Savic *et al.*, CETCh-seq: CRISPR epitope tagging ChIP-seq of DNA-binding proteins.  
267 *Genome Res.* **25**, 1581–1589 (2015).

- 268 17. J. Gu *et al.*, GoldCLIP: Gel-omitted Ligation-dependent CLIP. *Genomics Proteomics*  
269 *Bioinformatics*. **16**, 136–143 (2018).
- 270 18. Y. W. Iwasaki *et al.*, Piwi Modulates Chromatin Accessibility by Regulating Multiple Factors  
271 Including Histone H1 to Repress Transposons. *Mol. Cell*. **63**, 408–419 (2016).
- 272 19. G. Sienski, D. Dönertas, J. Brennecke, Transcriptional silencing of transposons by Piwi and  
273 maelstrom and its impact on chromatin state and gene expression. *Cell*. **151**, 964–980  
274 (2012).
- 275 20. E. V. Golubkova *et al.*, Dm nxf1/sbr gene affects the formation of meiotic spindle in female  
276 *Drosophila melanogaster*. *Chromosome Res*. **17**, 833–845 (2009).
- 277 21. B. Czech, G. J. Hannon, A Happy 3' Ending to the piRNA Maturation Story. *Cell*. **164**, 838–  
278 840 (2016).
- 279 22. J. S. Khurana, W. Theurkauf, piRNAs, transposon silencing, and *Drosophila* germline  
280 development. *J. Cell Biol*. **191**, 905–913 (2010).
- 281 23. L. H. Matzat, S. Berberoglu, L. Lévesque, Formation of a Tap/NXF1 homotypic complex is  
282 mediated through the amino-terminal domain of Tap and enhances interaction with  
283 nucleoporins. *Mol. Biol. Cell*. **19**, 327–338 (2008).
- 284 24. S. Aibara, J. Katahira, E. Valkov, M. Stewart, The principal mRNA nuclear export factor  
285 NXF1:NXT1 forms a symmetric binding platform that facilitates export of retroviral CTE-  
286 RNA. *Nucleic Acids Res*. **43**, 1883–1893 (2015).
- 287 25. D. E. Kerkow *et al.*, The structure of the NXF2/NXT1 heterodimeric complex reveals the  
288 combined specificity and versatility of the NTF2-like fold. *J. Mol. Biol*. **415**, 649–665 (2012).
- 289 26. B. van Steensel, A. S. Belmont, Lamina-Associated Domains: Links with Chromosome  
290 Architecture, Heterochromatin, and Gene Repression. *Cell*. **169**, 780–791 (2017).
- 291 27. B. D. Towbin, P. Meister, S. M. Gasser, The nuclear envelope--a scaffold for silencing?  
292 *Curr. Opin. Genet. Dev*. **19**, 180–186 (2009).
- 293 28. K. Saito *et al.*, A regulatory circuit for piwi by the large Maf gene traffic jam in *Drosophila*.  
294 *Nature*. **461**, 1296–1299 (2009).
- 295 29. C. D. Armour *et al.*, Digital transcriptome profiling using selective hexamer priming for  
296 cDNA synthesis. *Nat. Methods*. **6**, 647–649 (2009).
- 297 30. M. Martin, Cutadapt removes adapter sequences from high-throughput sequencing reads.  
298 *EMBnet.journal*. **17**, 10–12 (2011).
- 299 31. A. Dobin *et al.*, STAR: ultrafast universal RNA-seq aligner. *Bioinformatics*. **29**, 15–21  
300 (2013).
- 301 32. M. E. Ritchie *et al.*, limma powers differential expression analyses for RNA-sequencing and  
302 microarray studies. *Nucleic Acids Res*. **43**, e47–e47 (2015).
- 303 33. E. Radion *et al.*, Key role of piRNAs in telomeric chromatin maintenance and telomere

- 304 nuclear positioning in *Drosophila* germline. *Epigenetics Chromatin*. **11**, 40 (2018).
- 305 34. P. D. Adams *et al.*, PHENIX: a comprehensive Python-based system for macromolecular  
306 structure solution. *Acta Crystallogr. D Biol. Crystallogr.* **66**, 213–221 (2010).
- 307 35. P. Emsley, K. Cowtan, Coot: model-building tools for molecular graphics. *Acta Crystallogr.*  
308 *D Biol. Crystallogr.* **60**, 2126–2132 (2004).
- 309 36. A. Waterhouse *et al.*, SWISS-MODEL: homology modelling of protein structures and  
310 complexes. *Nucleic Acids Res.* **46**, W296–W303 (2018).
- 311 37. H. McWilliam *et al.*, Analysis Tool Web Services from the EMBL-EBI. *Nucleic Acids Res.*  
312 **41**, W597–600 (2013).
- 313 38. X. Robert, P. Gouet, Deciphering key features in protein structures with the new ENDscript  
314 server. *Nucleic Acids Res.* **42**, W320–4 (2014).
- 315
- 316

317 **Figure 1. dNxf2 functions as a cofactor of Panx in the piRNA pathway.**  
318 **A**, Western blots showing co-immunoprecipitation of endogenous dNxf2 with GFP-Panx from ovary  
319 lysates. Two different rabbit polyclonal monospecific dNxf2 (dNxf2-N and dNxf2-C) antibodies were  
320 used to detect endogenous dNxf2. **B**, Halo-ligand staining and western blots showing co-  
321 immunoprecipitation of endogenous Panx with dNxf2-Halo driven by the endogenous dNxf2  
322 promoter from OSC lysates. A rabbit polyclonal monospecific Panx antibody was used to detect  
323 endogenous Panx. Left panel shows depletion of dNxf2-Halo proteins in the unbound sample by  
324 Halo beads, and the anti-Tubulin blots serve as loading controls; Right panel shows endogenous  
325 Panx proteins. **C**, The effects of germline (*nanos*-GAL4) knockdown of the indicated genes on  
326 Renilla-normalized Firefly luciferase activity of the reporter while tethering  $\lambda$ N-Panx. For  
327 comparison, the relative value of the *attp2* control was used for normalization. Data show  
328 mean  $\pm$  s.d. ( $n = 15$ ;  $*P = 1.41387E-07$ ). **D**, Comparison of steady-state RNA levels are shown as  
329 reads per million (rpm) mapping to the sense strand of each transposon consensus from the *nanos*-  
330 GAL4 driven knockdown for dNxf2 (Y axis) versus control (X axis). Dashed lines indicate two-fold  
331 changes. The average of two replicates is shown. KD = knockdown. Red dots indicate transposon  
332 elements with significant changes. **E**, Comparison of steady-state RNA levels (RNA-seq; shown  
333 as RPM) mapping to the sense strands of each transposon consensus from the *nanos*-GAL4 driven  
334 knockdowns of the indicated genes. Red dots indicate transposon elements with significant  
335 changes from **D**. **F**, Heat map displaying steady-state RNA levels (RNA-seq) as reads per million  
336 (rpm) for top 70 detected transposons from the *nanos*-GAL4 driven knockdowns of the indicated  
337 genes in a blue-white scale.

338

339 **Figure 2. The UBA domain of dNxf2 interacts with Panx directly.**

340 **A**, Domain architectures of Panx, dNxf2, dNxf1, and dNxt1 are shown. Numbers above the  
341 diagrams correspond to amino acid residues of each protein. Domain names are abbreviated within  
342 respective colored region. **B-E**, Y2H assays mapping the interacting regions between *Drosophila*  
343 Nxf1/2 and Panx or dNxt1. Interactions were determined by either measuring the beta-  
344 galactosidase activity produced by the reporter gene or growth on YSD media lacking the indicated  
345 essential amino acid or Uracil. Data are averages of three independent experiments (n=3). Proteins  
346 or fragments shown above the dashed line are used as preys in the assays. **B**, Y2H assays  
347 mapping regions of *Drosophila* Nxf1/2 that interact with Panx. **C**, Y2H assays mapping regions of  
348 *Drosophila* Nxf1/2 that interact with dNxt. **D**, Yeast three hybrid determining the requirement of  
349 dNxt1 for Nxf2:Panx interaction. **E**, Y2H assays mapping minimum regions of Panx that interact  
350 with dNxf2<sup>UBA</sup>. **F**, Left panel shows the size exclusive chromatography profile of the NTF2 and UBA  
351 domains of dNxf2 forming heterodimers with dNxt1 and Panx<sup>NIR</sup> in solution, respectively. A dNxf2  
352 fragment spanning the NTF2 and UBA domains that is covalently linked to Panx<sup>NIR</sup> forms a stable  
353 complex with dNxt1. Right panel, SDS-PAGE shows the components of the peak in the elution  
354 profile. Color schemes used for the three complexes are indicated in the key. **G**, Quantification of  
355 the dissociation constant for the interaction between dNxf2<sup>UBA</sup> and Panx<sup>NIR</sup> as measured by an  
356 isothermal titration calorimetry assay.

357

358

359

360

361

362

363

364 **Figure 3. Structure of dNxf2<sup>UBA</sup> in complex with Panx<sup>NIR</sup>.**

365 **A**, Schematic of interacting region between dNxf2 and Panx. Numbers above or below the  
366 diagrams correspond to amino acid residues of dNxf2 or Panx, respectively. Domain names are  
367 abbreviated within respective colored region. NIR, dNxf2 interacting region. **B**, Left, cartoon  
368 representation of dNxf2<sup>UBA</sup> in complex with Panx<sup>NIR</sup>. The dNxf2<sup>UBA</sup> and Panx<sup>NIR</sup> fragment are  
369 colored in wheat and teal, respectively. Right, a view rotated 90° around the vertical axis. **C**,  
370 Electrostatic potential analysis showing the Panx-binding surface of dNxf2<sup>UBA</sup>. Panx<sup>NIR</sup> is shown in  
371 cartoon mode. **D**, A detailed view showing the interactions between dNxf2<sup>UBA</sup> and Panx<sup>NIR</sup>. Key  
372 residues involved in binding are shown in sticks. Close-up views of hydrophobic interactions  
373 between dNxf2<sup>UBA</sup> and Panx<sup>NIR</sup> are shown on the right. **E**, Y2H assays measuring the binding of  
374 wild-type or mutant dNxf2<sup>UBA</sup> with Panx<sup>NIR</sup>. Mutations of key residues are indicated along the bars.  
375 **F**, Western blots and Halo-ligand staining showing co-immunoprecipitation of GFP-tagged Panx or  
376 its NIR deletion mutant ( $\Delta$ NIR) with Halo-tagged dNxf2 or its F826A/I827A double mutant from OSC  
377 cells. GFP serves as a negative control. **G**, Effects of the indicated  $\lambda$ N fusion proteins or a non-  
378 tethering control (GFP-dNxf2) on luciferase activity of the reporters integrated into the attP2 landing  
379 site. Data show mean  $\pm$  s.d. ( $n = 15$ ;  $*P = 1.41387E-07$ ). **H**, The effects of  $\lambda$ N-dNxf2 tethering on  
380 luciferase activity of reporters with increasing number of BoxB sites. All reporters are integrated  
381 into the same genomic locus (attP2 landing site). Fold repression is calculated as total protein-  
382 normalized Firefly luciferase luminescent values of the control (no tethering) divided by that of the  
383 indicated experiments. Data show mean  $\pm$  s.d. ( $n = 15$ ;  $*P = 1.41387E-07$ ).

384

385



386 **Figure 4. The Pandas complex is required for piRNA-guided transposon silencing.**

387 **A**, Comparison of GoldCLIP-seq are shown as reads per million (rpm) mapping to the sense strand  
388 of each transposon consensus for Maelstrom (X axis) versus a LacZ control knockdown (Y axis).  
389 A mammalian spike-in was used to normalize different samples. Dashed lines indicate two-fold  
390 changes. The pooled reads from two replicates are shown. Red dots indicate Piwi-targeted  
391 transposons, blue dots indicate H1-dependent transposons and green dots indicate other  
392 transposons. **B**, The effects of germline specific knockdown (nanos-GAL4) of the indicated genes  
393 on Renilla-normalized Firefly luciferase activity of the reporter while tethering  $\lambda$ N-Panx. For  
394 comparison, the results from Fig. 1C (Egg, atp2 and Zuc) were shown here again. Data show  
395 mean  $\pm$  s.d. ( $n = 15$ ;  $*P = 1.41387E-07$ ). **C**, Western blots and Halo-ligand staining showing co-  
396 immunoprecipitation of GFP-tagged dNxf2 with Halo-tagged dNxf1 from OSC cells.  $\Delta$ NTF2, Halo-  
397 dNxf1 lacking the NTF2 domain, and GFP serves as a negative control. **D**, Western blots and Halo-  
398 ligand staining showing co-immunoprecipitation of Halo-tagged dNxf2-NTF2 domain with different  
399 domain truncations of GFP-tagged dNxf1 from OSC cells.  $\Delta$ RBD, dNxf1 lacking the N-terminus  
400 RRM and LRR domains; GFP serves as a negative control. **E**, SDS-PAGE showing pulldown  
401 results of the Nxf2<sup>NTF2+UBA</sup>-(GS)4-Panx<sup>NIR</sup>/dNxt1 complex by either GST-tagged dNxf1-NTF2 or  
402 dNxf1-(NTF2+UBA) respectively, compared to a GST control. **F**, RT-qPCR results showing the  
403 effects of germline (*nanos*-GAL4) knockdown of the indicated genes in the presence or absence of  
404 different transgenes. Fold changes are calculated as rp49-normalized RNA levels divided by that  
405 of the corresponding controls. Mean values  $\pm$  s.d. from 3 independent experiments are shown. **G**,  
406 SIM super-resolution microscopy of RNA FISH detected by HCR2.0. Data showing the comparison  
407 of the localizations of the reporter mRNAs tethered with  $\lambda$ N-FKBP, upon transient recruitment of  
408 either FRB-dNxf2 or FRB alone when treated with rapamycin for 2 hours to induce FKBP:FRB  
409 dimerization. Top panel, RNA signal (red) with DAPI staining; middle, DAPI staining (blue); bottom,  
410 RanGAP-GFP fusion protein (green) were shown. The scale bar represent 5  $\mu$ M in length.

# Figure 1

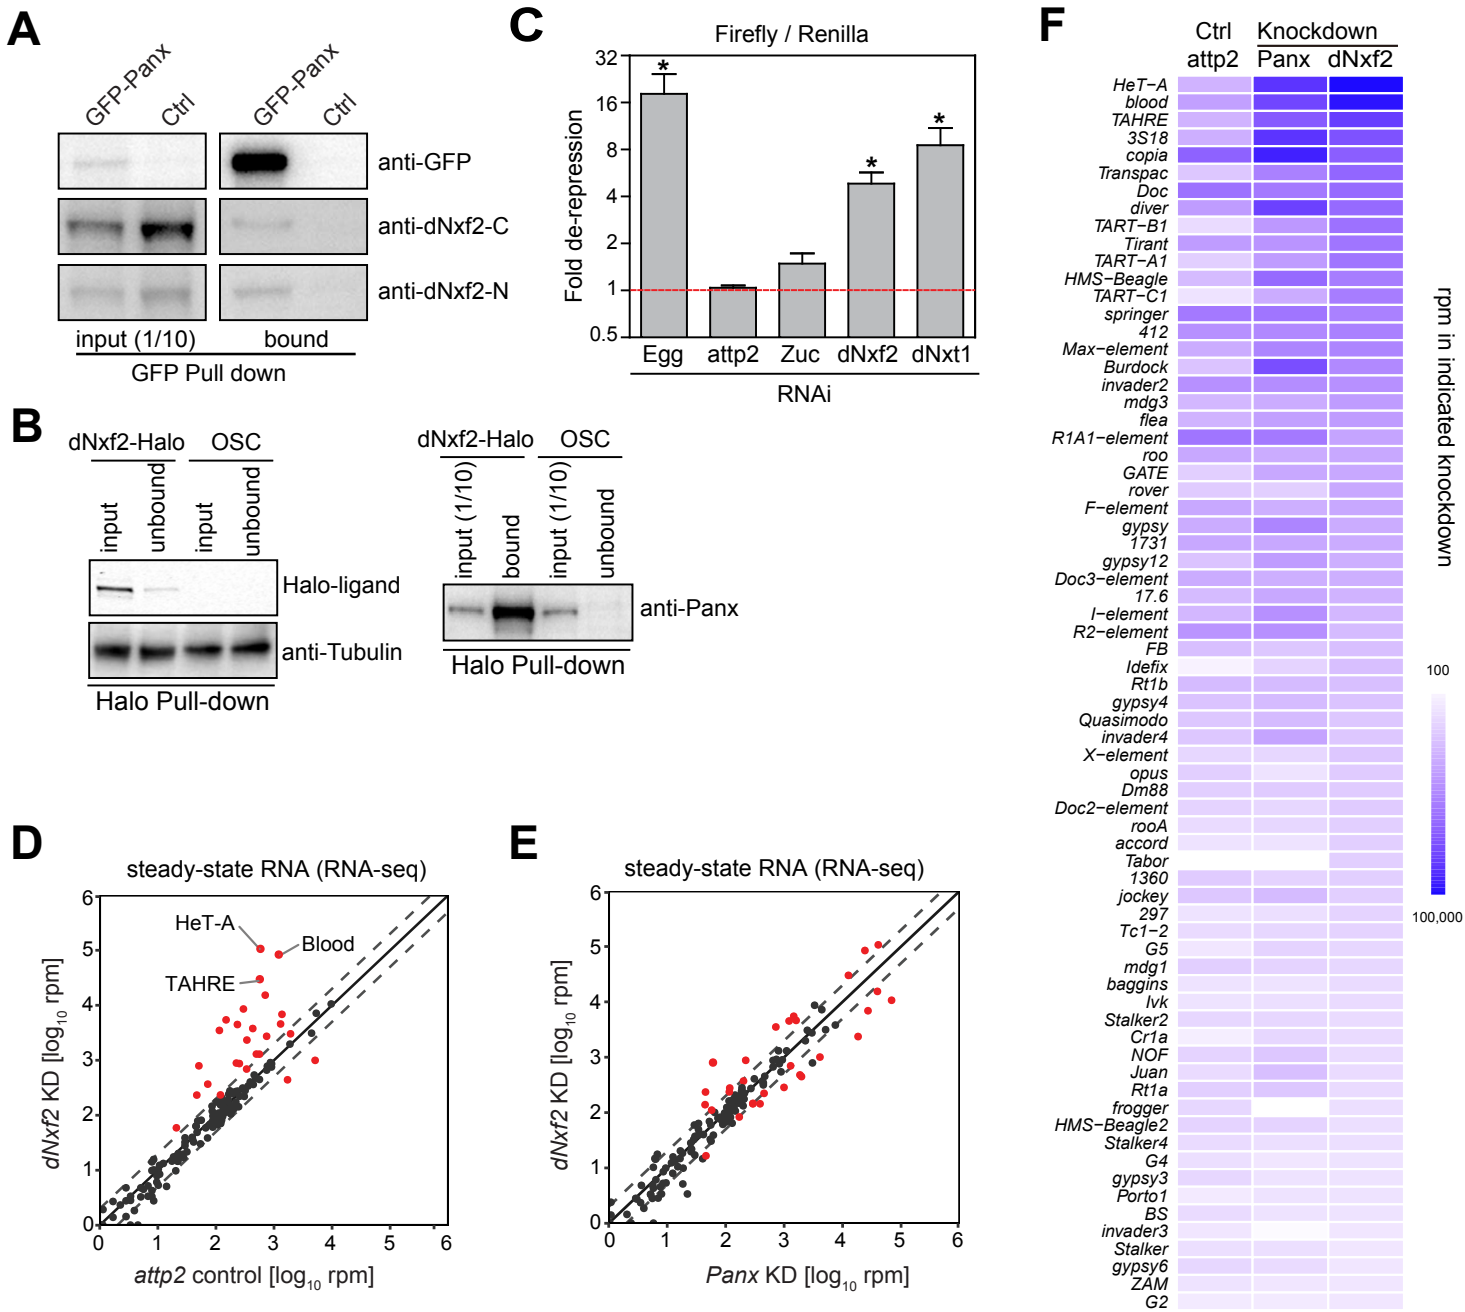

## Figure 2

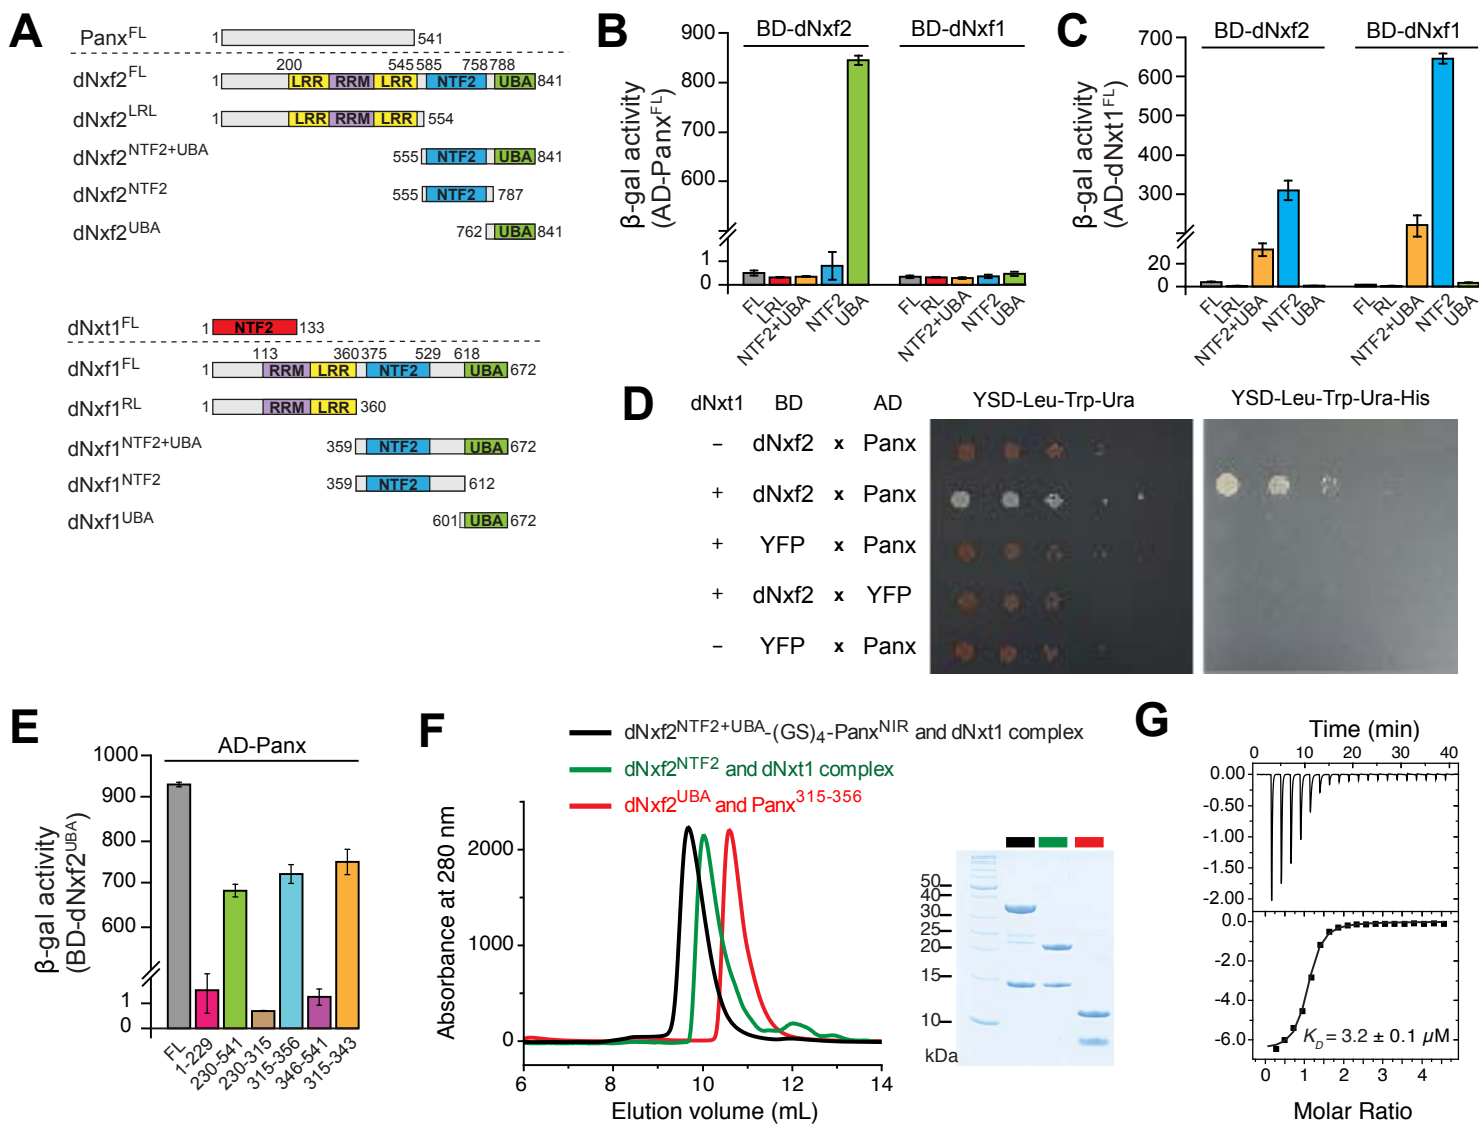

## Figure 3

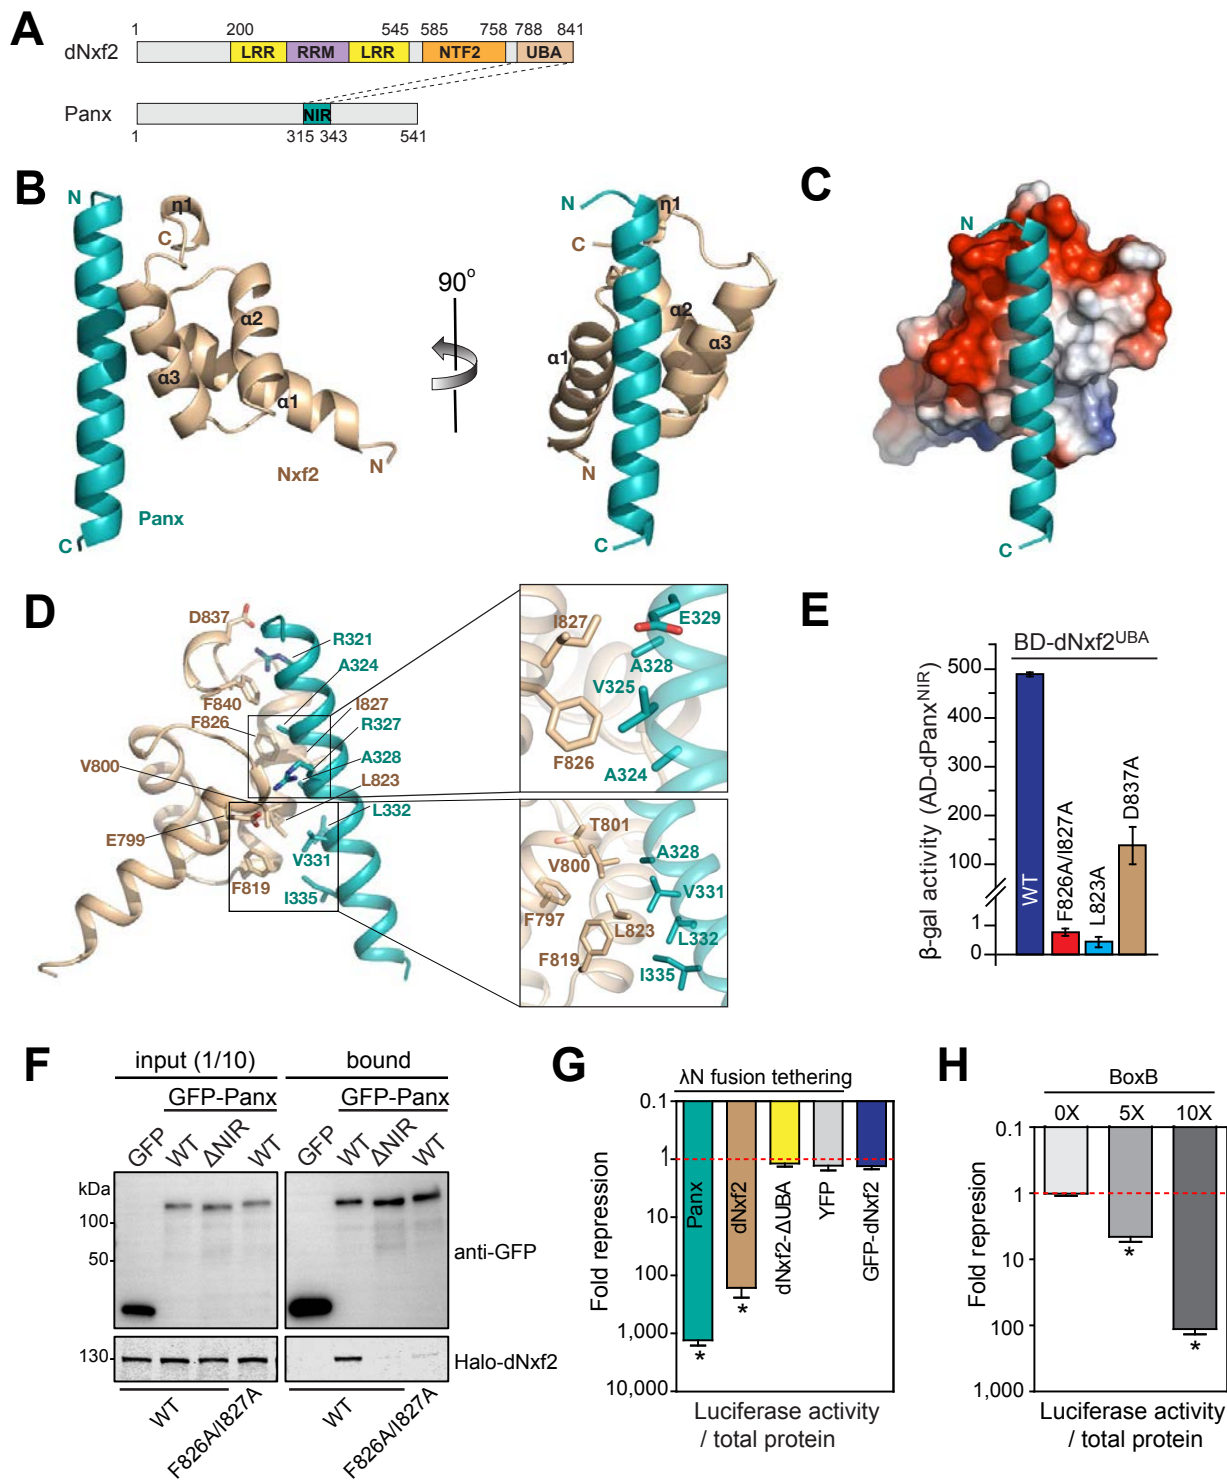

## Figure 4

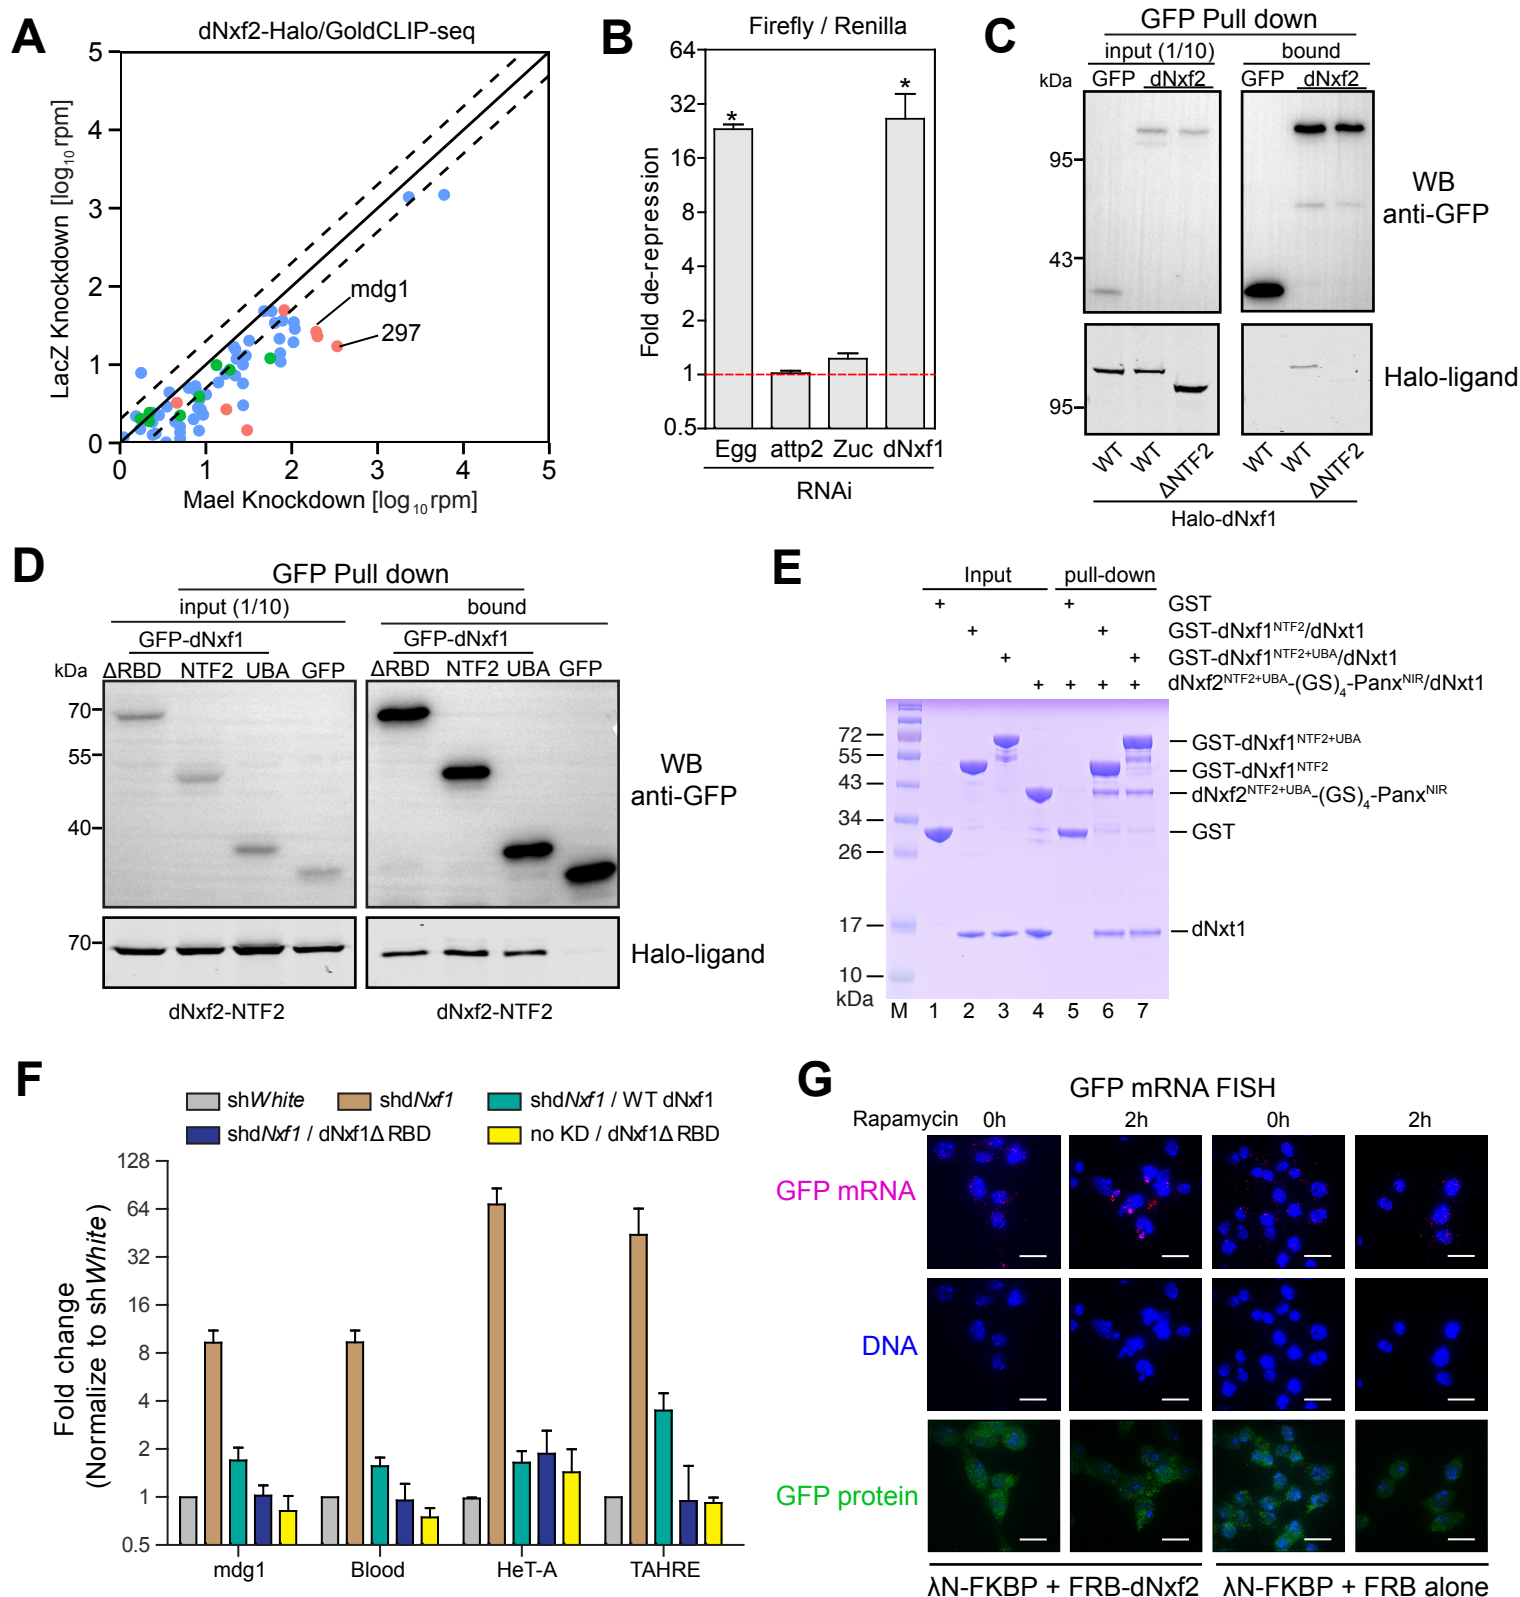

Source: https://www.biorxiv.org/content/10.1101/608273v1.full.pdf
